# Supplementary material for: Novel Y Chromosome Retrocopies in Canids Revealed through a Genome-Wide Association Study for Sex
Source: MDPI journal article supplement (doi:10.3390/genes10040320), 2019-04-25
Supplement: s1 [file s1]

Figure S3

|       |                                                                |
|-------|----------------------------------------------------------------|
| Chr27 | ACATCTTAAAGAGATTCAAGACCTGCAGAGTCGCCAGAAGCATGAAATTGAATCTTTGTA   |
| ChrY  | -----...C.....G.....                                           |
| ChrUn | -----C..C.....                                                 |
| Chr27 | TACCAAAGTGGGAAAGGTTCCCCCTGCTGTCATTATCCCCCAGCTGCCCCCTTTTTCAGG   |
| ChrY  | .....C.....T.....A.                                            |
| ChrUn | .....                                                          |
| Chr27 | GAGAAGAAGGCGACCCACTAAAAGCAAAGGCAGCAAGTCTAGTCGCAGCAGTTCCTTGGG   |
| ChrY  | .....C.....T.....                                              |
| ChrUn | .....T.....T.....                                              |
| Chr27 | GAATAAAAGTCCCCAGCTTTTTCAGGTAACCTGTCTGGTCAGAGTGCTGCTTCAGTTTTGCA |
| ChrY  | .....                                                          |
| ChrUn | .....T.....C.T.....                                            |
| Chr27 | CGCTCAGCAGACCCTCCACCCTCCTGGCAACATCCCTGAGACTGGGCCAAATCAGCTGTT   |
| ChrY  | T.....A.....                                                   |
| ChrUn | T.....T.....                                                   |
| Chr27 | ACAGCCCCTTAAGCCATCTCCCTCCAGTGACAACCTCTACTCAGCCTTTACCAGTGATGG   |
| ChrY  | .....A.....T.....AA.....                                       |
| ChrUn | .....T.....                                                    |
| Chr27 | TGCCATTTTCAGTCCCAAGCCTTTTCTGCTCCAGGTCAAGGGACCAGCAGCACAAACTGT   |
| ChrY  | .....A.....T.....G.....                                        |
| ChrUn | .....                                                          |
| Chr27 | CGGGGGAACAGTGAACAGCCAAGCTGCCCCAGCTCAGCCTCCTGCCATGACATCCAGCAG   |
| ChrY  | .....A.....                                                    |
| ChrUn | .A.....T.....A.....                                            |
| Chr27 | GAAGGGCACATTACAGATGACCTACACAAGTTGGTAGACAATTGGGCCCCGAGATGCCAT   |
| ChrY  | .....                                                          |
| ChrUn | .....A.....C.....                                              |
| Chr27 | GAATCTCTCAGGCAGAAGAGGAAGCAAAGGACACATGAATTATGAGGGCCCTGGAATGGC   |
| ChrY  | .....G.....                                                    |
| ChrUn | .....                                                          |
| Chr27 | AAGAAAGTTCTCCGCACCTGGTCAGCTGTGCATCTCCATGACCTCAAATCTGGGTGGTTC   |
| ChrY  | .....A.....C.T.....                                            |
| ChrUn | .....                                                          |
| Chr27 | TGCCCCATCTCTGCAGCATCAGCTACCTCTCTAGGTCACTTCACCAAGTCTATGTGCC     |
| ChrY  | .....T.                                                        |
| ChrUn | ...T.....T.....T                                               |
| Chr27 | CCCACAGCAGTACGGTTTTTCCAGCTCCCCCTTTGGCACTCAGTGGAGTGGGACGGGT-G   |
| ChrY  | .....A.....A.....A.....A...T.                                  |
| ChrUn | .....A...-                                                     |
| Chr27 | GCCCCGCACCACAGCCACTTGGCCAGTTCAGCCTGTGGGAACTGCCTCCTTACAGAATT    |
| ChrY  | ...T.....T.....C.....                                          |
| ChrUn | .....                                                          |

|       |                                                              |
|-------|--------------------------------------------------------------|
| Chr27 | TCAACATCAGCAATTTGCAGAAATCCATCAGCAACCCCCCAGGTTCCAACCTGCGGACCA |
| ChrY  | .....G.....T..A.....                                         |
| ChrUn | .....A.....                                                  |
| Chr27 | CTTAGACCTAGAGACTTTAACTGAGTAGATTTGGGGGCAGGAGATGGAATGCTGAGGGGT |
| ChrY  | .....                                                        |
| ChrUn | .....G.....C.....                                            |
| Chr27 | GGGTGGGAGGGGGGGGAATGGGAAAGTAGCCTATATACTAACTACTAGTGCTGCATTTAA |
| ChrY  | .....--.....                                                 |
| ChrUn | .....-.....G.....                                            |
| Chr27 | CTGGTTATTTCTTGCCAGAAAGGAATGTTTTTT                            |
| ChrY  | T.....                                                       |
| ChrUn | T.....A.....                                                 |
