# Supplementary material for: Novel Y Chromosome Retrocopies in Canids Revealed through a Genome-Wide Association Study for Sex
Source: MDPI journal article supplement (doi:10.3390/genes10040320), 2019-04-25
Supplement: s1 [file s1]

**Table S1**

| <b>Species</b>                | <b>Common name</b> | <b>Sex</b> | <b>SRR#</b> |
|-------------------------------|--------------------|------------|-------------|
| <i>Canis lupus familiaris</i> | Dog                | M          | 5190662     |
| <i>Canis lupus familiaris</i> | Dog                | M          | 5190661     |
| <i>Canis lupus familiaris</i> | Dog                | M          | 7956102     |
| <i>Canis lupus familiaris</i> | Dog                | F          | 5190660     |
| <i>Canis lupus familiaris</i> | Dog                | F          | 4011155     |
| <i>Canis latrans</i>          | Coyote             | M          | 6324296     |
| <i>Canis latrans</i>          | Coyote             | F          | 4029416     |
| <i>Lycaon pictus</i>          | African wild dog   | M          | 2971425     |
| <i>Lycaon pictus</i>          | African wild dog   | F          | 2971441     |
| <i>Vulpes vulpes</i>          | Red fox            | M          | 5328110     |
| <i>Vulpes vulpes</i>          | Red fox            | M          | 5328115     |
| <i>Vulpes vulpes</i>          | Red fox            | F          | 5280489     |
| <i>Urocyon littoralis</i>     | Island fox         | M          | 5198012     |
| <i>Urocyon littoralis</i>     | Island fox         | F          | 5197998     |
| <i>Urocyon littoralis</i>     | Island fox         | F          | 5198009     |
| <i>Urocyon littoralis</i>     | Island fox         | F          | 5198001     |
