# Supplementary material for: Novel Y Chromosome Retrocopies in Canids Revealed through a Genome-Wide Association Study for Sex
Source: MDPI journal article supplement (doi:10.3390/genes10040320), 2019-04-25
Supplement: s1 [file s1]

Fig S2

|         |                                                                       |      |
|---------|-----------------------------------------------------------------------|------|
| PPP2CB  | CCGCGCTCCCGCCACCTCCCGCGCCCTTCGCCGGCT-----                             | 38   |
| PPP2CBY | ..A.....G.....TG..-.....A.T....CCCAGGGCGCGCGGCCGGGTGG                 | 59   |
| PPP2CB  | GCG-GGGCGGGCGAGGGACCCCGCAGGCCGCGCGCCGGGAGCCGCCCGCTGGCCTTGGGC          | 97   |
| PPP2CBY | ...A..C.....T.T.....T...TG.....                                       | 119  |
| PPP2CB  | GGGGCGAGGGGCGCGAGCCGCGCCGCCCGCTCCCTCCTCTGCCGCTGGGAGCCGCTGG            | 157  |
| PPP2CBY | C.....T....A...C.T.....T.....T.....                                   | 179  |
| PPP2CB  | CGGCGGGAGAGGGGAGCGGCGCGCGGGGCGCGGGAGGGCAGGGGCGGGGTGGGGG-----          | 212  |
| PPP2CBY | .....CG.G..C...T.....AT.....T....TGGTG                                | 239  |
| PPP2CB  | --GAGGGAGGCAGCGGCCCGCC <b>ATG</b> GACGACAAGGCGTTCACCAAGGAGCTGGACCAGTG | 270  |
| PPP2CBY | GC.G.....C.....-----                                                  | 273  |
| PPP2CB  | GGTCGAGCAGCTCAACGAGTGTAAGCAGCTGAACGAGAACCAGGTGCGGACGCTGTGCGA          | 330  |
| PPP2CBY | ----...G....GG..C.....A...T.C.....                                    | 329  |
| PPP2CB  | GAAGGCTAAGGAAATTTTAACAAAAGAATCAAATGTGCAAGAGGTTCTGTTGTCCTGTAAC         | 390  |
| PPP2CBY | .....T.....A....                                                      | 389  |
| PPP2CB  | CGTATGCGGAGATGTGCATGGTCAATTTTCATGATCTTATGGAACCTTTTCGAATTGGTGG         | 450  |
| PPP2CBY | .....A.....A.....T.....A..T....A.....                                 | 449  |
| PPP2CB  | AAAATCACCAGATACAACTATCTGTTTCATGGGCGACTATGTAGACAGAGGCTATTACTC          | 510  |
| PPP2CBY | .....-----G.....                                                      | 502  |
| PPP2CB  | AGTGGAGACTGTGACTCTTCTTGTGGCATTAAAGGTGCGTTATCCAGAACGCATTACAAT          | 570  |
| PPP2CBY | .....--.....G.....A.....                                              | 560  |
| PPP2CB  | ATTGAGAGGAAACCATGAAAGCCGACAAATTACCCAAGTATATGGCTTTTACGATGAATG          | 630  |
| PPP2CBY | .....C.G.....C..T.....                                                | 620  |
| PPP2CB  | T-CTACGAAAGTATGGAAATGCCAATGTTTGGAAATATTTACAGATCTATTTGATTATC           | 689  |
| PPP2CBY | .T...T.....                                                           | 680  |
| PPP2CB  | TTCCACTTACAGCTTTAGTAGATGGACAGATATTCTGCCTCCACGGTGGCCTCTCTCCAT          | 749  |
| PPP2CBY | .....G.G.....GT.....                                                  | 740  |
| PPP2CB  | CCATAGATACACTGGATCATATCAGAGCTTTGGATCGTTTACAAGAAGTTCCACATGAGG          | 809  |
| PPP2CBY | .....T..A.....                                                        | 800  |
| PPP2CB  | GCCCAATGTGTGATCTGTTGTGGTCAGATCCAGATGATCGTGGTGGGTGGGGTATTTTAC          | 869  |
| PPP2CBY | .....                                                                 | 860  |
| PPP2CB  | CTCGTGGTGCTGGCTACACATTTGGACAAGACATTTCTGAAACATTTAACCACGCCAATG          | 929  |
| PPP2CBY | .....C...G..                                                          | 920  |
| PPP2CB  | GTCTCACACTGGTTTCTCGAGCTCACCAACTTGTAATGGAGGGATACAATTGGTGTGCATG         | 989  |
| PPP2CBY | ....--.....C.....                                                     | 978  |
| PPP2CB  | ATCGGAATGTGGTTACCATTTTCAGTGCACCCAATTACTGTTATCGTTGTGGGAACCAGG          | 1049 |
| PPP2CBY | .....-----TTCC                                                        | 1015 |
| PPP2CB  | CTGCTATCATGGAATTAGATGACACTTTAAAAATATTCCTTCCTTCAGTTTGACCCAGCAC         | 1109 |
| PPP2CBY | A.....                                                                | 1075 |

|         |                                                                        |      |
|---------|------------------------------------------------------------------------|------|
| PPP2CB  | CTCGTCGTGGAGAGCCTCATGTTACCCGGCGCACCCCAGACTACTTCCTG <b>TAA</b> ATTTCTC  | 1169 |
| PPP2CBY | .....G.....T.....                                                      | 1135 |
| PPP2CB  | CTGGGAAAAACTTGCCTTTGTATGTGGAAGTATACCTGGCTTTTAAAA---TATATATA            | 1226 |
| PPP2CBY | .....A.....-...TATA.....                                               | 1194 |
| PPP2CB  | TTTAAAAACAAAACAAAAAAGCAACAGTAATGTATGTGTTTCTGTAACAAATTGGGATC            | 1286 |
| PPP2CBY | .....--.....                                                           | 1251 |
| PPP2CB  | TGTCTTGGCATTAAACCATATCATGGACCAAAATGTGCCATACTAATGATGAG <b>G</b> CATTTAG | 1346 |
| PPP2CBY | ..... <b>A</b> .....                                                   | 1311 |
| PPP2CB  | CACAATTTGAGACTGAAATTTAGTACACTATGTTCTAGATCGGTCAGTCTTAACAGTTTG           | 1406 |
| PPP2CBY | .....T.....                                                            | 1371 |
| PPP2CB  | CCTGCTGTATTTGTAGTAACCATTTTCCTCTGGACTGTTCAAGCAAAAAAGGTAACAACTAAC        | 1466 |
| PPP2CBY | .T.....G.....A..A.....                                                 | 1431 |
| PPP2CB  | TCCTTCATCTTCTTTTGCACCTTATTTGGAAATTTTAGTTATAGTGTTTAACTGGCATGGA          | 1526 |
| PPP2CBY | .....C.....                                                            | 1491 |
| PPP2CB  | TTGATAGAGTTGGAGTTTTATTTTAAAGAAAAATTCACAAGCTAACTTCCATTTAATCCA           | 1586 |
| PPP2CBY | .....C.....G.....                                                      | 1551 |
| PPP2CB  | TTACCCTTTATTTTATTGAAATGTATAGTTAAATTAAGTGAAGAAAAGATTCTTGGGAGT           | 1646 |
| PPP2CBY | .....G.....A....                                                       | 1611 |
| PPP2CB  | ATGTTGTCATAACATTTTAAAAGGTTTCCCTTCATTTAACTAAATTACTGTTTTATGTT            | 1706 |
| PPP2CBY | .....                                                                  | 1671 |
| PPP2CB  | GATCTGCATATTT <b>C</b> TGTATATTTGTCATGACAGTGCTTGCATCCTATTTGGTGTACTGAG  | 1766 |
| PPP2CBY | ..... <b>T</b> ...G.....-----..A.....                                  | 1722 |
| PPP2CB  | CAAATAAACTTTCCATTTTAAACAAAA                                            | 1793 |
| PPP2CBY | .....A.....                                                            | 1749 |
