# Supplementary material for: Novel Y Chromosome Retrocopies in Canids Revealed through a Genome-Wide Association Study for Sex
Source: MDPI journal article supplement (doi:10.3390/genes10040320), 2019-04-25
Supplement: s1 [file s1]

Figure S1

|       |                                                                       |      |
|-------|-----------------------------------------------------------------------|------|
| MITF  | CCCCCGCCCCGGGCTCTGTTCTCACTTTGCAGCCGTGGAAGGACTGGGAGCGGGAGCCA           | 60   |
| MITFY | A.....A....A.....C.....                                               | 60   |
| MITF  | <b>TG</b> CAGTCGGAATCGGGGATCGTGCCGGATTTCTGAAGTCGGGGAGGAGTTTCACGAAGAGC | 120  |
| MITFY | .....C.....A.....                                                     | 120  |
| MITF  | CCAAAACCTATTACGAACTCAAAAGTCAACCTCTGAAGAGCAGCAGTTCCGAGGAGCATC          | 180  |
| MITFY | .....G.....C.....T.....                                               | 180  |
| MITF  | CTGGGGCCTCCAAGCCTCCGATAAGCTCCTCCAGTATGACATCACGCATCTTGCTACGCC          | 240  |
| MITFY | .....A.....                                                           | 240  |
| MITF  | AGCAACTCATGCGTGAGCAAATGCAGGAGCAGGAGCGCAGGGAGCAGCAGCAGAAGCTGC          | 300  |
| MITFY | .A.....A.....                                                         | 300  |
| MITF  | AGGCGGCCCAGTTCATGCAACAGAGAGTGCCTGTGAGCCAGACCCCAGCCATAAACGTCA          | 360  |
| MITFY | .....                                                                 | 360  |
| MITF  | GCGTGCCCAACCACCCTTCCCTCTGCCACCCAGGTGCCGATGGAAGTCCTCAAGGTGCAGA         | 420  |
| MITFY | .T.....C.....                                                         | 420  |
| MITF  | CCCACCTCGAAAACCCACCAAGTACCACATACAGCAAGCCCAAAGGCAGCAGGTAAAGC           | 480  |
| MITFY | .....                                                                 | 480  |
| MITF  | AGTACCTTTCTACCACTTTAGCAAATAAACATGCCAACCAAGTCCTGAGCTTGCCATGTC          | 540  |
| MITFY | .....                                                                 | 540  |
| MITF  | CAAACCAGCCTGGCGATCATGTTCATGCCACCAGTGCCGGGGAGCAGCGCACCCAACAGCC         | 600  |
| MITFY | .....T.....                                                           | 600  |
| MITF  | CCATGGCTATGCTCACACTTAACTCCAACCTGTGAAAAAGAGGGATTTTATAAGTTTGAAG         | 660  |
| MITFY | .....A.....                                                           | 660  |
| MITF  | AGCAAAACAGGGCGGAAAGTGAATGCCCAACCATGAACACGCATTACAGAGCATCGTGCA          | 720  |
| MITFY | .....                                                                 | 720  |
| MITF  | TGCAGATGGATGATGTAATTGATGACATCATTAGCCTAGAATCAAGTTATAATGAAGAAA          | 780  |
| MITFY | .....                                                                 | 780  |
| MITF  | TCCTGGGATTGATGGATCCTGCTTTGCAAATGGCAAATACGTTACCTGTCTCTGGAAATC          | 840  |
| MITFY | .....                                                                 | 840  |
| MITF  | TGATTGATCTTTATGGCAACCAAGGCCTGCCTCCCCCAGGCCTCACCATCAGCAACTCCT          | 900  |
| MITFY | .....                                                                 | 900  |
| MITF  | GTCCAGCCAACCTTCCCAACATAAAAAGGGAGCTCACAGCGTGTATTTTTCCACAGAAT           | 960  |
| MITFY | .....A.....                                                           | 960  |
| MITF  | CTGAAGCGAGAGCATTGGCTAAAGAGAGGCAAAAAA-GGACAATCACAACTTGATTGAA           | 1019 |
| MITFY | .....TA.....A.....                                                    | 1020 |
| MITF  | CGAAGACGACGATTTAACATAAATGACCGCATTAAGAAGTAGGTACTTTGATTCCCAAG           | 1079 |
| MITFY | .....C.....                                                           | 1080 |

|       |                                                                      |      |
|-------|----------------------------------------------------------------------|------|
| MITF  | TCAAATGATCCAGACATGCGTTGGAACAAGGGAACCATCTTAAAAGCATCTGTGGACTAT         | 1139 |
| MITFY | .A.....T.....                                                        | 1140 |
| MITF  | ATCCGAAAGTTGCAACGAGAACAGCAACGTGCAAAAGAACTTGAAAATCGACAGAAGAAA         | 1199 |
| MITFY | .....C.....T.                                                        | 1200 |
| MITF  | TTGGAGCACGCCAACCGGCATTTGTTGCTCAGAATACAGGAACCTTGAAATGCAGGCTCGA        | 1259 |
| MITFY | .....G.....                                                          | 1260 |
| MITF  | GCTCATGGACTTTCACTTATTCCATCCACGGGCCTCTGCTCTCCAGACTTGGTGAATCGG         | 1319 |
| MITFY | .....A.....                                                          | 1320 |
| MITF  | ATCATCAAGCAGGAACCCACTCTTGAGAACTGCAACCAAGACCTCCTTCAGCATCATGCA         | 1379 |
| MITFY | .....A.....                                                          | 1380 |
| MITF  | GACCTACCTTGTACGACGACGCTTGATCTCACAGATGGCAGCATCACCTTCAACAACAAC         | 1439 |
| MITFY | .....G.....                                                          | 1440 |
| MITF  | CTTGGAGCCGGGACCGAGAGTAGCCAAGCCTATAGCGTCCCCACGAAAATGGGATCCAAA         | 1499 |
| MITFY | .....T.....T.....                                                    | 1500 |
| MITF  | CTGGAAGACATCCTGATGGATGACACTCTTTCTCCCGTTGGTGTAAGTACCCACTCCTT          | 1559 |
| MITFY | .....                                                                | 1560 |
| MITF  | TCATCAGTGTCCCCTGGAGCTTCCAAAACAAGCAGCCGAAGGAGCAGCATGAGCATGGAA         | 1619 |
| MITFY | .....T.....                                                          | 1620 |
| MITF  | GAAACCGATCATGCTTGT <b>TAG</b> CAGGCCCTCCCTGCTCTGCGCTTTCAAAACTGCTTCCT | 1679 |
| MITFY | .....T.....                                                          | 1680 |
| MITF  | TTCTTGATTTCGTAGGTTTCATAATTTACCTGAAGGGGTTTTCTTGATAATTTTCCTTTAA        | 1739 |
| MITFY | .....C.....                                                          | 1740 |
| MITF  | TATGAAATTTTTTTTCATGCTTTACCAATAGCCCAGGATATATTTTATTTTATAGATTTT         | 1799 |
| MITFY | .....--.....G.                                                       | 1798 |
| MITF  | GTGAAACAGACTTGTATATTCTATTTTACAACCTACAAATGCCTCCAAAGTCTTGACCAT         | 1859 |
| MITFY | .....G.....G.....                                                    | 1858 |
| MITF  | ACGTGTACAGTATCTGTGAAGTGAATTCACCCTGGACTTTAGCTTTCTGAGCAAGAGGAT         | 1919 |
| MITFY | .....C.....                                                          | 1918 |
| MITF  | TTTTGCATCAGAGAAATTTCTGTCCATTTTATTTCAGGGGAAACTTGGTTTGAGATTTT          | 1979 |
| MITFY | .....G.....                                                          | 1978 |
| MITF  | ATGTCTGTGGCATCTTTGGAAATTAAATGTAAAGTTTAATCGAAAGAATGTAAAGC             | 2035 |
| MITFY | .....                                                                | 2034 |
